# Supplementary material for: Effects of Hospital Digitization on Clinical Outcomes and Patient Satisfaction: Nationwide Multiple Regression Analysis Across German Hospitals
Source: PubMed Central journal article supplement (PMC9693730; doi:10.2196/40124), 2022-11-10
Supplement: jmir_v24i11e40124_app1.pdf [file jmir_v24i11e40124_app1.pdf]

## Multimedia Appendix 1

### 2020 Healthcare IT Report Scoring Model

| <b>HIT domain</b>                   | <b>Maximum attainable scores</b>                  |                                                          |
|-------------------------------------|---------------------------------------------------|----------------------------------------------------------|
|                                     | <i>Adoption</i><br>“HIT availability”<br>(summed) | <i>User-perceived value</i><br>“HIT value”<br>(averaged) |
| <b>Admission</b>                    | <b>30</b>                                         | <b>10</b>                                                |
| Occupancy control                   | 10                                                | 10                                                       |
| Anamnesis                           | 10                                                | 10                                                       |
| Emergency room triage               | 10                                                | 10                                                       |
| <b>Surgery preparation</b>          | <b>30</b>                                         | <b>10</b>                                                |
| Scheduling                          | 10                                                | 10                                                       |
| Room planning                       | 10                                                | 10                                                       |
| Resource planning                   | 10                                                | 10                                                       |
| <b>Discharge</b>                    | <b>35</b>                                         | <b>10</b>                                                |
| Nursing report                      | 7                                                 | 10                                                       |
| Digital dictation                   | 7                                                 | 10                                                       |
| Medication plan                     | 7                                                 | 10                                                       |
| Communication w outpatient sector   | 7                                                 | 10                                                       |
| Patient portal                      | 7                                                 | 10                                                       |
| <b>Clinical documentation</b>       | <b>77</b>                                         | <b>10</b>                                                |
| Surgery docu.                       | 7                                                 | 10                                                       |
| Medical basis docu.                 | 7                                                 | 10                                                       |
| Physician letter                    | 7                                                 | 10                                                       |
| Wound docu.                         | 7                                                 | 10                                                       |
| Medical report                      | 7                                                 | 10                                                       |
| Anesthesia docu.                    | 7                                                 | 10                                                       |
| Hygiene docu.                       | 7                                                 | 10                                                       |
| Nursing docu.                       | 7                                                 | 10                                                       |
| Special nursing docu.               | 7                                                 | 10                                                       |
| Therapy docu.                       | 7                                                 | 10                                                       |
| Intensive care docu.                | 7                                                 | 10                                                       |
| <b>Order entry and reporting</b>    | <b>42</b>                                         | <b>10</b>                                                |
| Laboratory data                     | 7                                                 | 10                                                       |
| Radiology incl. images              | 7                                                 | 10                                                       |
| Radiology excl. images              | 7                                                 | 10                                                       |
| Other exams                         | 7                                                 | 10                                                       |
| Electrophysiological exams          | 7                                                 | 10                                                       |
| Councils                            | 7                                                 | 10                                                       |
| <b>Decision support</b>             | <b>42</b>                                         | <b>10</b>                                                |
| <b>Access to clinical databases</b> | 7                                                 | 10                                                       |
| <b>Alarms</b>                       | 7                                                 | 10                                                       |
| <b>Clinical reminders</b>           | 7                                                 | 10                                                       |
| <b>Medical guidelines</b>           | 7                                                 | 10                                                       |
| <b>Medication support</b>           | 7                                                 | 10                                                       |

|                                                     |            |           |
|-----------------------------------------------------|------------|-----------|
| <b>Decision support for diagnostics and therapy</b> | 7          | 10        |
| <b>Patient safety</b>                               | <b>49</b>  | <b>10</b> |
| Laboratory assay ID                                 | 7          | 10        |
| CIRS                                                | 7          | 10        |
| Patient ID                                          | 7          | 10        |
| Checklists                                          | 7          | 10        |
| Medication order                                    | 7          | 10        |
| Electronic medical administration record            | 7          | 10        |
| Medication tracking                                 | 7          | 10        |
| <b>Supply functions</b>                             | <b>40</b>  | <b>10</b> |
| Apothecary                                          | 10         | 10        |
| Food orders                                         | 10         | 10        |
| Material management                                 | 10         | 10        |
| Material management incl standards                  | 10         | 10        |
| <b>Interface functions</b>                          | <b>50</b>  | <b>10</b> |
| Duty planning                                       | 10         | 10        |
| ADT patient planning                                | 10         | 10        |
| Electronic archive                                  | 10         | 10        |
| Outpatient patient management                       | 10         | 10        |
| Quality management                                  | 10         | 10        |
| <b>Telemedicine &amp; -monitoring</b>               | <b>20</b>  | <b>10</b> |
| Telemedicine                                        | 10         | 10        |
| Telemonitoring                                      | 10         | 10        |
| <b>Total digital maturity</b>                       | <b>415</b> | <b>10</b> |
