# Supplementary material for: Effects of Hospital Digitization on Clinical Outcomes and Patient Satisfaction: Nationwide Multiple Regression Analysis Across German Hospitals
Source: PubMed Central journal article supplement (PMC9693730; doi:10.2196/40124), 2022-11-10
Supplement: jmir_v24i11e40124_app2.pdf [file jmir_v24i11e40124_app2.pdf]

## Multimedia Appendix 2

Overview of single outcome indicators considered for calculation of consolidated O/E values for elective and emergency care.

| <b>Consolidated O/E ratio</b>   | <b>Averaged input indicators for consolidated O/E ratio</b>                                                                                                                                                                                                                                                                                            |
|---------------------------------|--------------------------------------------------------------------------------------------------------------------------------------------------------------------------------------------------------------------------------------------------------------------------------------------------------------------------------------------------------|
| <b>O/E ratio emergency care</b> | Stroke (ICD: I61, I63 & I64) <ul style="list-style-type: none"><li>- 30-day risk-adjusted standardized mortality rate</li></ul> Myocardial infarction (heart attack) (ICD: I21 & I22) <ul style="list-style-type: none"><li>- 30-day risk-adjusted standardized mortality rate</li></ul>                                                               |
| <b>O/E ratio elective care</b>  | Hip replacement surgery due to coxarthrosis (OPS: 5-820.0/8/9/x) <ul style="list-style-type: none"><li>- 90-day risk-adjusted standardized mortality rate</li><li>- Risk-adjusted revision surgery within 365 days</li><li>- Risk-adjusted surgical complications within 90/365 days</li><li>- Risk-adjusted femoral fracture within 90 days</li></ul> |
