# Supplementary material for: Effects of Hospital Digitization on Clinical Outcomes and Patient Satisfaction: Nationwide Multiple Regression Analysis Across German Hospitals
Source: PubMed Central journal article supplement (PMC9693730; doi:10.2196/40124), 2022-11-10
Supplement: jmir_v24i11e40124_app3.pdf [file jmir_v24i11e40124_app3.pdf]

## Multimedia Appendix 3

### Robustness analysis

The robustness of all estimated OLS regressions was tested to assure that coefficients were unbiased and close to the actual population values (see Multimedia Appendix 2 for details). Results of the Shapiro-Wilk test suggested that the null hypothesis of normally distributed residuals cannot be rejected. Heteroscedasticity was assessed by applying the White test, which generated negative results. Multicollinearity was tested by determining Variance Inflation Factors (VIF) for all estimated coefficients. Besides the VIFs for ( $\#emergency\ cases$ ) and ( $\#emergency\ cases$ )<sup>2</sup>, none of these was higher than five and, hence, it can be assumed that the model was not significantly affected by multicollinearity. Additionally,  $R^2$  was determined to capture the proportion of variance for the dependent variables explained by independent variables. F-tests were executed, determining the overall significance of regressions. All estimated regressions except for the ones involving EHR effects on emergency care outcomes successfully passed the test. Furthermore, all regressions were additionally estimated without considering control variables, which generated the same direction for significant main effects. The exclusion of control variables naturally resulted in lower  $R^2$  and F values (see below).

**Table 3** OLS estimates for linear-in-parameter regressions capturing the impact of HIT and EHR on emergency care clinical outcomes (*without control variables*)

| Dependent variable:  | ln(O/E ratio emergency care) <sup>a</sup> |         |                    |         |                      |         |
|----------------------|-------------------------------------------|---------|--------------------|---------|----------------------|---------|
|                      | I (HIT)                                   |         | II (EHR adoption)  |         | III (EHR user value) |         |
| Model                | $\hat{\beta}$ (SE)                        | P-value | $\hat{\beta}$ (SE) | P-value | $\hat{\beta}$ (SE)   | P-value |
| Intercept            | 0.244                                     | .026    | -0.048             | .299    | 0.174                | .249    |
| $HIT_{adoption}^b$   | -0.001                                    | .823    |                    |         |                      |         |
| $HIT_{user-value}^c$ | -0.036                                    | .024    |                    |         |                      |         |
| $EHR_{adoption}^d$   |                                           |         | 0.108              | .198    |                      |         |
| $EHR_{user-value}^c$ |                                           |         |                    |         | -0.019               | .355    |
| Sub-sample size      | 261                                       |         | 174                |         | 82                   |         |
| $R^2$                | 0.02                                      |         | 0.015              |         | 0.011                |         |
| F-value              | 2.682                                     | 0.07    | 2.754              | .198    | 0.865                | .355    |

Note: Rounded figures, ln implies natural logarithm; <sup>a</sup>O/E ratio implies better performance with lower values; <sup>b</sup>on a 0-415 scale from worst to best; <sup>c</sup>on a 1-10 scale from worst to best; <sup>d</sup>implies adoption of EHR

**Table 4** OLS estimates for linear-in-parameter regressions capturing the impact of HIT and EHR on elective care clinical outcomes (*without control variables*)

| Dependent variable:  | ln(O/E ratio elective care) <sup>a</sup> |         |                    |         |                      |         |
|----------------------|------------------------------------------|---------|--------------------|---------|----------------------|---------|
|                      | I (HIT)                                  |         | II (EHR adoption)  |         | III (EHR user value) |         |
| Model                | $\hat{\beta}$ (SE)                       | P-value | $\hat{\beta}$ (SE) | P-value | P-value              | P-value |
| Intercept            | -0.194                                   | .464    | -0.059             | .564    | 0.902                | .012    |
| $HIT_{adoption}^b$   | 0.001                                    | .626    |                    |         |                      |         |
| $HIT_{user-value}^c$ | 0.008                                    | .818    |                    |         |                      |         |

von Wedel et al. (2022) – Effects of hospital digitization on clinical outcomes and patient satisfaction: Nationwide multiple regression analysis across German hospitals

|                      |       |        |       |        |       |
|----------------------|-------|--------|-------|--------|-------|
| $EHR_{adoption}^d$   |       | -0.023 | .872  |        |       |
| $EHR_{user-value}^c$ |       |        |       | -0.146 | .008  |
| Sub-sample size      | 184   | 118    |       | 59     |       |
| $R^2$                | 0.002 | 0.001  |       | 0.118  |       |
| F-value              | 0.147 | .864   | 0.026 | .872   | 7.621 |
|                      |       |        |       |        | .008  |

Note: Rounded figures,  $\ln$  implies natural logarithm; <sup>a</sup>O/E ratio implies better performance with lower values; <sup>b</sup>on a 0-415 scale from worst to best; <sup>c</sup>on a 1-10 scale from worst to best; <sup>d</sup>implies adoption of EHR

**Table 5** OLS estimates for linear-in-parameter regressions capturing the impact of HIT and HER on patient satisfaction (*without control variables*)

| Dependent variable:  | ln(Overall PEQ score) <sup>a</sup> |         |                    |         |                      |         |
|----------------------|------------------------------------|---------|--------------------|---------|----------------------|---------|
|                      | I (HIT)                            |         | II (EHR adoption)  |         | III (EHR user value) |         |
| Model                | $\hat{\beta}$ (SE)                 | P-value | $\hat{\beta}$ (SE) | P-value | $\hat{\beta}$ (SE)   | P-value |
| Intercept            | 0.728                              |         | 0.671              | <.001   | 0.693                | <.001   |
| $HIT_{adoption}^b$   | 0.001                              | .002    |                    |         |                      |         |
| $HIT_{user-value}^c$ | -0.014                             | .001    |                    |         |                      |         |
| $EHR_{adoption}^d$   |                                    |         | 0.024              | .151    |                      |         |
| $EHR_{user-value}^c$ |                                    |         |                    |         | -0.001               | .963    |
| Sub-sample size      | 310                                |         | 203                |         | 93                   |         |
| $R^2$                | 0.061                              |         | 0.01               |         | <0.001               |         |
| F-value              | 10.038                             | <.001   | 2.082              | .151    | 0.002                | .963    |

Note: Rounded figures,  $\ln$  implies natural logarithm; <sup>a</sup>on a 1-6 scale from best to worst; <sup>b</sup>on a 0-415 scale from worst to best; <sup>c</sup>on a 1-10 scale from worst to best; <sup>d</sup>implies adoption of EHR

Overview of additional exploratory regressions

**Table 1** OLS estimates for linear-in-parameter regressions capturing the impact of admission-HIT on emergency care clinical outcomes

| <b>Dependent variable: ln(O/E ratio emergency care)<sup>a</sup></b> |                |       |         |
|---------------------------------------------------------------------|----------------|-------|---------|
| <b>Model</b>                                                        | <b>I (HIT)</b> |       |         |
|                                                                     | $\hat{\beta}$  | SE    | P-value |
| Intercept                                                           | 0.887          | 0.553 | .109    |
| <i>Admission<sub>adoption</sub><sup>b</sup></i>                     | 0.001          | 0.004 | .832    |
| <i>Admission<sub>user-value</sub><sup>c</sup></i>                   | -0.023         | 0.013 | .073    |
| #beds                                                               |                |       |         |
| <150                                                                | 0.066          | 0.096 | .495    |
| 150-300                                                             | 0.012          | 0.047 | .799    |
| 301-600                                                             | -0.031         | 0.053 | .552    |
| >600                                                                | -0.046         | 0.091 | .612    |
| ln(#total cases)                                                    | 0.083          | 0.174 | .121    |
| ln(#emergency cases)                                                | -0.68          | 0.174 | .001    |
| ln(#emergency cases) <sup>2</sup> <sup>d</sup>                      | 0.072          | 0.02  | .001    |
| Teaching[YES]                                                       | -0.02          | 0.035 | .565    |
| Private[YES]                                                        | 0.007          | 0.039 | .854    |
| Sub-sample size                                                     | 232            |       |         |
| R <sup>2</sup>                                                      | 0.113          |       |         |
| F-value                                                             | 2.824          |       | .003    |

Note: Rounded figures, ln implies natural logarithm; <sup>a</sup>O/E ratio implies better performance with lower values; <sup>b</sup>on a 0-30 scale from worst to best; <sup>c</sup>on a 1-10 scale from worst to best; <sup>d</sup>tests for an inversed U-shaped relationship between case volumes and outcomes for emergency care

**Table 2** OLS estimates for linear-in-parameter regressions capturing the impact of admission-HIT on patient satisfaction with admission

| <b>Dependent variable: ln(Admission PEQ score)<sup>a</sup></b> |                          |       |         |
|----------------------------------------------------------------|--------------------------|-------|---------|
| <b>Model</b>                                                   | <b>I (Admission-HIT)</b> |       |         |
|                                                                | $\hat{\beta}$            | SE    | P-value |
| Intercept                                                      | 0.073                    | 0.121 | .546    |
| <i>Admission<sub>adoption</sub><sup>b</sup></i>                | 0.002                    | 0.001 | .031    |
| <i>Admission<sub>user-value</sub><sup>c</sup></i>              | -0.009                   | 0.004 | .015    |
| #beds                                                          |                          |       |         |
| <150                                                           | -0.091                   | 0.021 | <.001   |
| 150-300                                                        | 0.008                    | 0.012 | .527    |
| 301-600                                                        | 0.022                    | 0.014 | .101    |
| >600                                                           | 0.061                    | 0.021 | .005    |
| ln(#total cases)                                               | 0.061                    | 0.013 | <.001   |

von Wedel et al. (2022) – Effects of hospital digitization on clinical outcomes and patient satisfaction: Nationwide multiple regression analysis across German hospitals

|                              |        |       |       |
|------------------------------|--------|-------|-------|
| Geography[East] <sup>d</sup> | -0.029 | 0.009 | .001  |
| Teaching[YES]                | -0.003 | 0.009 | .763  |
| Private[YES]                 | 0.003  | 0.009 | .775  |
| Sub-sample size              | 267    |       |       |
| R <sup>2</sup>               | 0.489  |       |       |
| F-value                      | 27.29  |       | <.001 |

*Note: Rounded figures, ln implies natural logarithm; <sup>a</sup>on a 1-6 scale from best to worst; <sup>b</sup>on a 0-30 scale from worst to best; <sup>c</sup>on a 1-10 scale from worst to best; <sup>d</sup>Effect of hospital being located in an Eastern German state*
